# Supplementary material
Source: PubMed Central journal article supplement (PMC5501771)
Supplement: mmc1.pdf [file mmc1.pdf]

**Supplemental Data**

**Loss-of-Function Variants in *MYLK***

**Cause Recessive Megacystis Microcolon**

**Intestinal Hypoperistalsis Syndrome**

**Danny Halim, Erwin Brosens, Françoise Muller, Michael F. Wangler, Arthur L. Beaudet, James R. Lupski, Zeynep H. Coban Akdemir, Michael Doukas, Hans J. Stoop, Bianca M. de Graaf, Rutger W.W. Brouwer, Wilfred F.J. van Ijcken, Jean-François Oury, Jonathan Rosenblatt, Alan J. Burns, Dick Tibboel, Robert M.W. Hofstra, and Maria M. Alves**

Figure S1: AOH regions present in subject 1

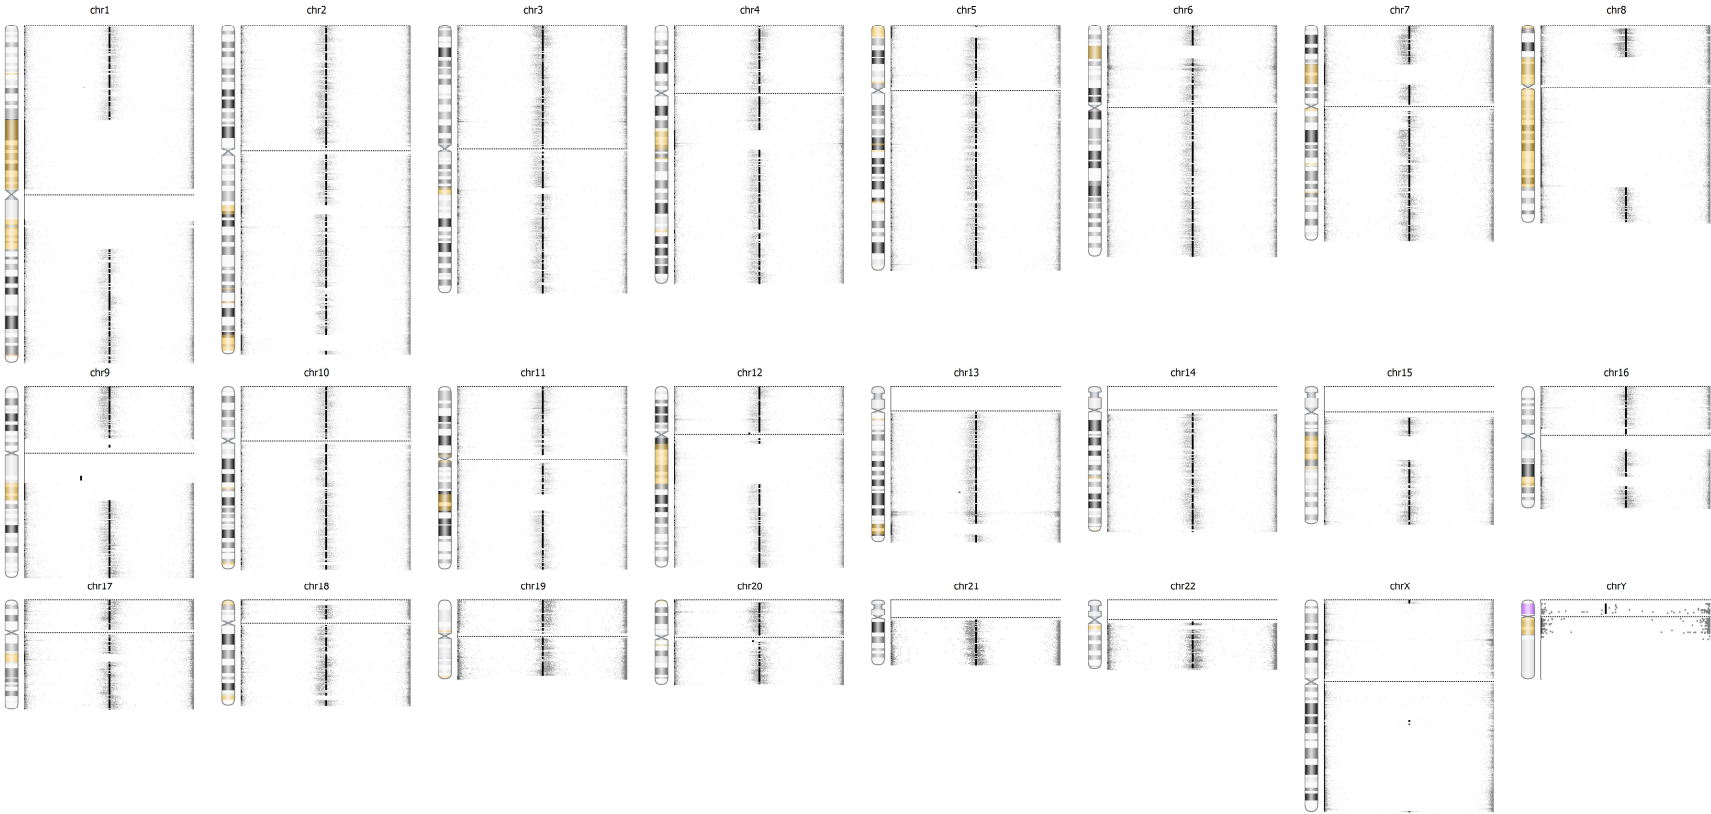

**Figure S2: Filtering criteria used to analyze the whole exome sequencing data of subject 1 and subject 3.** High quality variants with a read depth  $\geq 5$  were retained for further analysis. An allele frequency cut-off of 1% in public databases (ExAC release 0.3, ESP6500SI-V2; 1000 Genomes Phase 3 release v5.20130502 and GoNL SNPs and Indels release 5) was considered for homozygous variants. Only variants predicted to affect splicing, nonsense variants, and coding and non-coding variants with a CADD score above 20 (CADD v1.3) were prioritized as likely deleterious. Subject 1 and subject 3 shared two genes with autosomal recessive variants. However, only *MYLK* had variants predicted to be deleterious and was expressed in fetal gut and bladder, the two major organs affected in MMIHS.

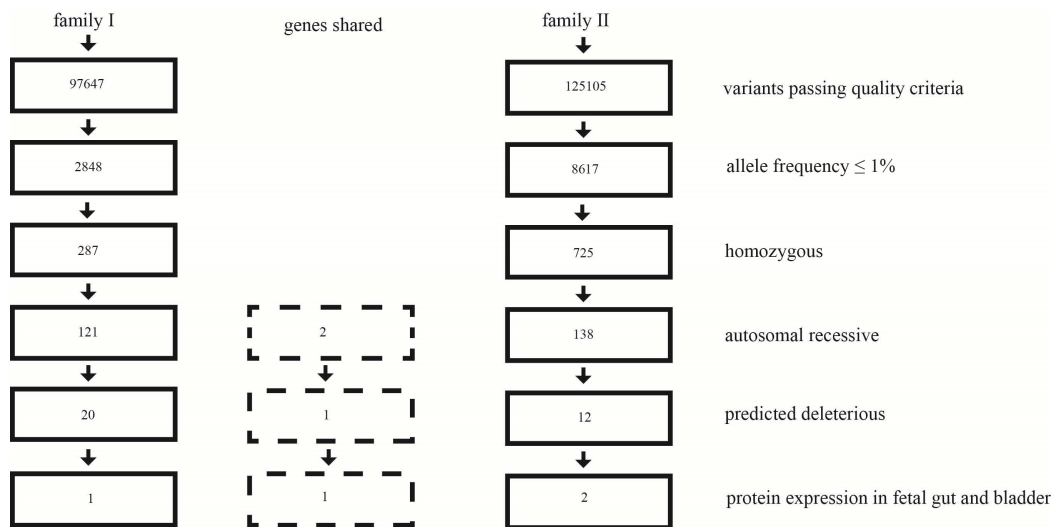

Figure S3: AOH regions present in subject 3

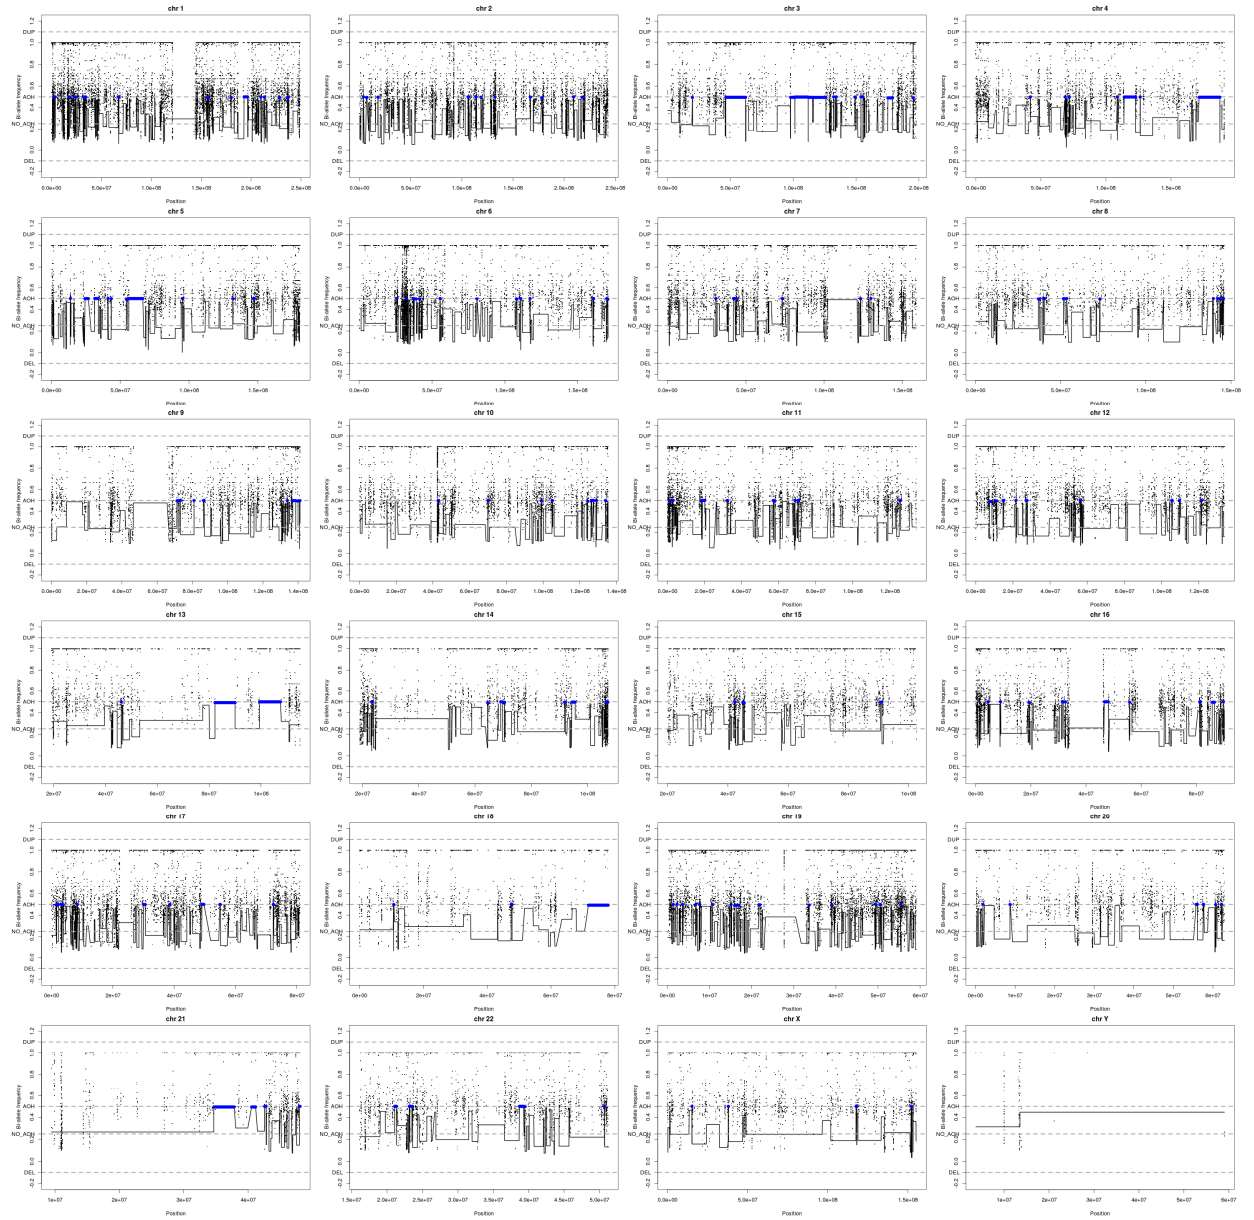

**Figure S4: Schematic representation of *MYLK* with its 33 exons and its three *major* isoforms, with the variants identified in MMIHS affected individuals depicted.**

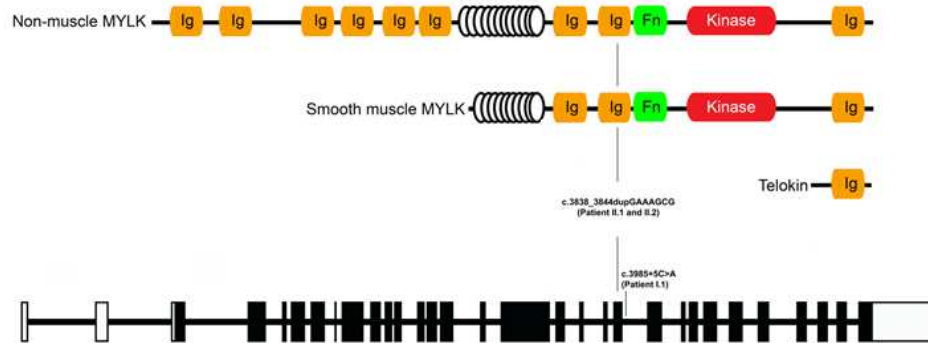

**Figure S5: Schematic illustration of the molecular mechanisms required for SMC contraction and the effect of impaired *MYLK* expression on this mechanism.** In the wild type situation, MYLK phosphorylates the regulatory light chain (RLC) of myosin, leading to its activation and subsequent interaction with actin filaments. As a consequence, SMCs contraction occurs. In the presence of any of the variants identified, *MYLK* expression is impaired, and phosphorylation of the RLC cannot occur. Therefore, myosin is unable to interact with actin filaments and SMC contraction is impaired.

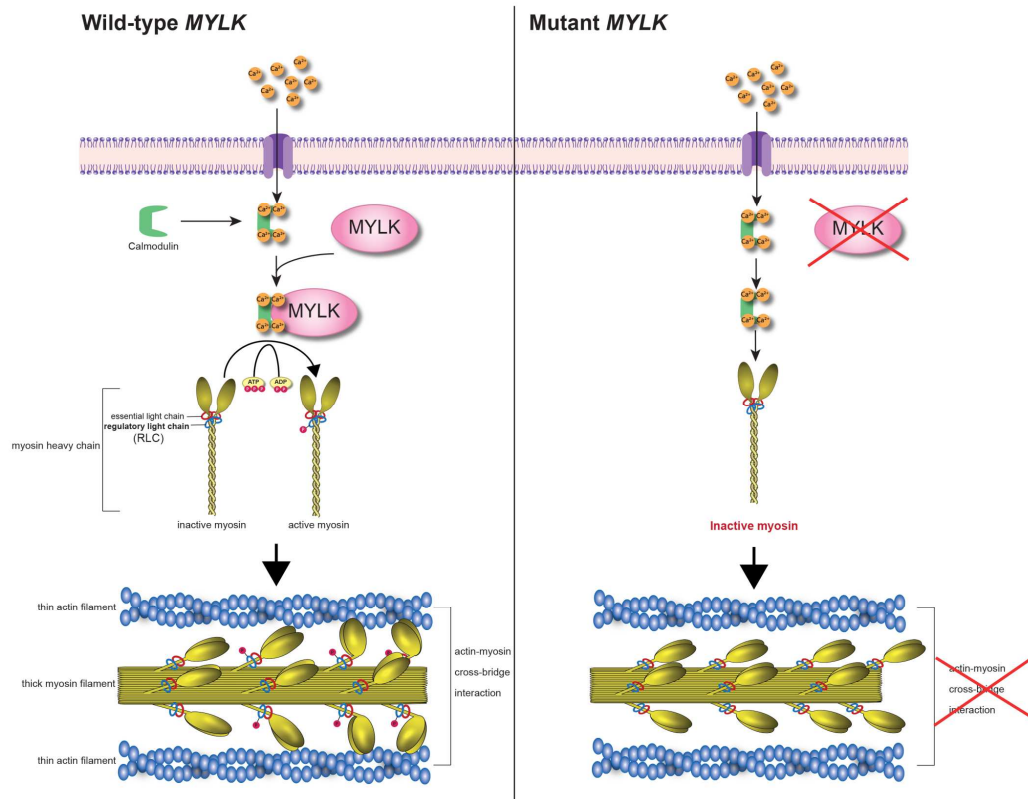

**Table S1: ROH regions present in subject 1 (>1MB)**

| Chr. | ROH region               | Size (kb) |
|------|--------------------------|-----------|
| 1    | chr1:242944438-244084838 | 1140400   |
| 1    | chr1:145416055-147826789 | 2410734   |
| 1    | chr1:150856155-165465569 | 14609414  |
| 1    | chr1:70267535-120553638  | 50286103  |
| 2    | chr2:193957725-194971610 | 1013885   |
| 2    | chr2:228026937-231049859 | 3022922   |
| 2    | chr2:132604119-139882966 | 7278847   |
| 2    | chr2:231059532-240330999 | 9271467   |
| 3    | chr3:120385537-121923035 | 1537498   |
| 3    | chr3:121931699-124830052 | 2898353   |
| 4    | chr4:87160439-91509561   | 4349122   |
| 4    | chr4:77709496-86985942   | 9276446   |
| 5    | chr5:92602370-93717798   | 1115428   |
| 5    | chr5:41416674-42624527   | 1207853   |
| 5    | chr5:87090359-88357858   | 1267499   |
| 5    | chr5:179620442-180915260 | 1294818   |
| 5    | chr5:1483897-8953381     | 7469484   |
| 6    | chr6:15067080-19041846   | 3974766   |
| 6    | chr6:19050234-25173355   | 6123121   |
| 7    | chr7:122810117-123980215 | 1170098   |
| 7    | chr7:101954468-103191686 | 1237218   |
| 7    | chr7:40483744-43163338   | 2679594   |
| 7    | chr7:29178667-40443341   | 11264674  |
| 8    | chr8:0-2683108           | 2683108   |
| 8    | chr8:46886735-119798778  | 72912043  |
| 9    | chr9:70984372-84389822   | 13405450  |
| 11   | chr11:54794237-56482051  | 1687814   |
| 11   | chr11:79726393-91682741  | 11956348  |
| 12   | chr12:42347636-71689131  | 29341495  |
| 13   | chr13:23646794-24668110  | 1021316   |
| 15   | chr15:36662007-54162140  | 17500133  |
| 16   | chr16:68580385-73593216  | 5012831   |
| 17   | chr17:44287381-45879796  | 1592415   |
| 17   | chr17:41687610-44278785  | 2591175   |
| 18   | chr18:334419-3513265     | 3178846   |
| 19   | chr19:55569398-59128983  | 3559585   |
| 20   | chr20:0-1613328          | 1613328   |
| 22   | chr22:18922645-21800198  | 2877553   |

**Table S2: ROH regions present in subject 3 (>1MB)**

| <b>Chr.</b> | <b>ROH region</b>        | <b>Size (kb)</b> |
|-------------|--------------------------|------------------|
| 1           | Chr1:192999051-196461513 | 3462462          |
| 2           | Chr2:23785517-24914125   | 1128608          |
| 2           | Chr2:38809162-42181226   | 3372064          |
| 2           | Chr2:47748292-48935849   | 1187557          |
| 2           | Chr2:214228792-216256775 | 2027983          |
| 2           | Chr2:217541582-218713924 | 1172342          |
| 3           | Chr3:46480801-62229553   | 15748752         |
| 3           | Chr3:97982936-101389864  | 3406928          |
| 3           | Chr3:101443461-111936564 | 10493103         |
| 3           | Chr3:111958510-115528917 | 3570407          |
| 3           | Chr3:116163902-126070625 | 9906723          |
| 3           | Chr3:175345143-178978718 | 3633575          |
| 4           | Chr4:114028149-122683007 | 8654858          |
| 4           | Chr4:171525788-187530313 | 16004525         |
| 5           | Chr5:24510242-26915466   | 2405224          |
| 5           | Chr5:31532429-34124590   | 2592161          |
| 5           | Chr5:56271822-66480004   | 10208182         |
| 5           | Chr5:112101793-114462589 | 2360796          |
| 5           | Chr5:159776047-161128914 | 1352867          |
| 6           | Chr6:37897839-39162227   | 1264388          |
| 6           | Chr6:91278482-97096363   | 5817881          |
| 7           | Chr7:64721546-66262309   | 1540763          |
| 7           | Chr7:102330349-121081115 | 18750766         |
| 8           | Chr8:136560952-139190957 | 2630005          |
| 9           | Chr9:8518143-17579198    | 9061055          |
| 9           | Chr9:46386688-65636192   | 19249504         |
| 9           | Chr9:114985985-116130371 | 1144386          |
| 9           | Chr9:136944465-138646881 | 1702416          |
| 9           | Chr9:138656707-139944509 | 1287802          |
| 10          | Chr10:19498278-20568524  | 1070246          |
| 10          | Chr10:92813181-93841227  | 1028046          |
| 11          | Chr11:18956194-20127046  | 1170852          |
| 11          | Chr11:62064841-64525464  | 2460623          |
| 11          | Chr11:65623347-67572698  | 1949351          |
| 12          | Chr12:7463491-8688999    | 1225508          |
| 13          | Chr13:82265231-90015578  | 7750347          |
| 13          | Chr13:99449898-107516570 | 8066672          |
| 14          | Chr14:94391699-95556747  | 1165048          |
| 16          | Chr16:5257260-8740015    | 3482755          |
| 16          | Chr16:46637746-48118036  | 1480290          |
| 17          | Chr17:4997039-6014176    | 1017137          |
| 18          | Chr18:71740503-77927028  | 6186525          |
| 19          | Chr19:8151418-10229521   | 2078103          |
| 20          | Chr20:2277020-4704957    | 2427937          |
| 20          | Chr20:35263266-36375071  | 1111805          |
| 21          | Chr21:34668747-37834258  | 3165511          |



**Table S3: Primer sets used in this study**

| <b>Primer</b> | <b>Sequence</b>       |
|---------------|-----------------------|
| <i>MYLKF</i>  | TCAGGGAAGCTGGACTCTGG  |
| <i>MYLKR</i>  | CAGGGAGTCTGTGGGTTGC   |
| MinigeneF     | GCCCCCTTCCTTTCCTAGCC  |
| MinigeneR     | GCAGGGAGTCTGTGGGTTGC  |
| SD6F          | TCTGAGTCACCTGGACAACC  |
| SA2R          | GCTCACAAATACCACTGAGAT |
